# Supplementary material for: Comparative Analysis of FCGR Gene Polymorphism in Pulmonary Sarcoidosis and Tuberculosis
Source: MDPI journal article supplement (doi:10.3390/cells12091221), 2023-04-23
Supplement: s1 [file s1]

## Supplementary Materials to article:

# Comparative Analysis of *FCGR* Gene Polymorphism in Pulmonary Sarcoidosis and Tuberculosis

Marlena Typiak <sup>1†</sup> & Bartłomiej Rękawiecki <sup>2†</sup>, Krzysztof Rębała <sup>3</sup> and Anna Dubaniewicz <sup>2,\*</sup>

1 Department of General and Medical Biochemistry, Faculty of Biology, University of Gdansk, 80-308 Gdansk, Poland; marlena.typiak@ug.edu.pl

2 Department of Pulmonology, Medical University of Gdansk, 80-214 Gdansk, Poland

3 Department of Forensic Medicine, Medical University of Gdansk, 80-204 Gdansk, Poland

\* Correspondence: aduban@gumed.edu.pl

† These authors contributed equally to this work.

**Table S1.** Frequency of the occurrence of individual *FCGR2A* alleles in the studied groups and subgroups. Cont. – healthy control; SA – group of patients with sarcoidosis; TB – group of patients with tuberculosis.

| Studied group         | Frequency of <i>FCGR2A</i> alleles [n (%)] |          |
|-----------------------|--------------------------------------------|----------|
|                       | 131H                                       | 131R     |
| SA total (n = 144)    | 161 (56)                                   | 127 (44) |
| SA stage I (n = 36)   | 42 (58)                                    | 30 (42)  |
| SA stage II (n = 53)  | 56 (53)                                    | 50 (47)  |
| SA stage III (n = 34) | 43 (63)                                    | 25 (37)  |
| SA stage IV (n = 21)  | 20 (49)                                    | 22 (51)  |
| TB (n = 179)          | 199 (56)                                   | 159 (44) |
| Cont. (n = 145)       | 169 (58)                                   | 121 (42) |

**Table S2.** Frequency of the occurrence of individual *FCGR2A* genotypes in the studied groups and subgroups. Cont. – healthy control; SA – group of patients with sarcoidosis; TB – group of patients with tuberculosis.

| Studied group         | Frequency of <i>FCGR2A</i> genotypes [n (%)] |         |           |
|-----------------------|----------------------------------------------|---------|-----------|
|                       | 131HH                                        | 131HR   | 131RR     |
| SA total (n = 144)    | 44 (30.5)                                    | 73 (51) | 27 (18.5) |
| SA stage I (n = 36)   | 10 (28)                                      | 22 (61) | 4 (11)    |
| SA stage II (n = 53)  | 13 (24)                                      | 30 (57) | 10 (19)   |
| SA stage III (n = 34) | 17 (50)                                      | 9 (26)  | 8 (24)    |
| SA stage IV (n = 21)  | 4 (19)                                       | 12 (57) | 5 (24)    |
| TB (n = 179)          | 53 (30)                                      | 93 (52) | 33 (18)   |
| Cont. (n = 145)       | 49 (34)                                      | 71 (49) | 25 (17)   |

**Table S3.** Frequency of the occurrence of individual *FCGR2B* alleles in the studied groups and subgroups. Cont. – healthy control; SA – group of patients with sarcoidosis; TB – group of patients with tuberculosis.

| Studied group         | Frequency of <i>FCGR2B</i> alleles [n (%)] |           |
|-----------------------|--------------------------------------------|-----------|
|                       | 232I                                       | 232T      |
| SA total (n = 134)    | 233 (87)                                   | 35 (13)   |
| SA stage I (n = 30)   | 52 (87)                                    | 8 (13)    |
| SA stage II (n = 49)  | 86 (88)                                    | 12 (12)   |
| SA stage III (n = 34) | 58 (85)                                    | 10 (15)   |
| SA stage IV (n = 21)  | 37 (88)                                    | 5 (12)    |
| TB (n = 97)           | 167 (86)                                   | 27 (14)   |
| Cont. (n = 101)       | 173 (85.5)                                 | 29 (14.5) |

**Table S4.** Frequency of the occurrence of individual *FCGR2B* genotypes in the studied groups and subgroups. Cont. – healthy control; SA – group of patients with sarcoidosis; TB – group of patients with tuberculosis.

| Studied group         | Frequency of <i>FCGR2B</i> genotypes [n (%)] |           |       |
|-----------------------|----------------------------------------------|-----------|-------|
|                       | 232II                                        | 232IT     | 232TT |
| SA total (n = 134)    | 100 (74.5)                                   | 33 (24.5) | 1 (1) |
| SA stage I (n = 30)   | 23 (77)                                      | 6 (20)    | 1 (3) |
| SA stage II (n = 49)  | 37 (75.5)                                    | 12 (24.5) | 0     |
| SA stage III (n = 34) | 24 (70.5)                                    | 10 (29.5) | 0     |
| SA stage IV (n = 21)  | 16 (76)                                      | 5 (24)    | 0     |
| TB (n = 97)           | 70 (72)                                      | 27 (28)   | 0     |
| Cont. (n = 101)       | 73 (72)                                      | 27 (27)   | 1 (1) |

**Table S5.** Frequency of the occurrence of individual *FCGR2C* alleles in the studied groups and subgroups. Cont. – healthy control; SA – group of patients with sarcoidosis; TB – group of patients with tuberculosis.

| Studied group         | Frequency of <i>FCGR2C</i> alleles [n (%)] |            |                |
|-----------------------|--------------------------------------------|------------|----------------|
|                       | 57X                                        | 57Q        | Gene deletions |
| SA total (n = 149)    | 220 (74)                                   | 76 (25.5)  | 1 (0.5)        |
| SA stage I (n = 37)   | 61 (82)                                    | 13 (18)    | 0              |
| SA stage II (n = 57)  | 94 (82)                                    | 20 (18)    | 0              |
| SA stage III (n = 34) | 43 (63)                                    | 25 (37)    | 0              |
| SA stage IV (n = 21)  | 22 (52)                                    | 18 (43)    | 1 (5)          |
| TB (n = 179)          | 187 (52)                                   | 163 (45.5) | 4 (2.5)        |
| Cont. (n = 148)       | 257 (87)                                   | 39 (13)    | 0              |

**Table S6.** Frequency of the occurrence of individual *FCGR2C* genotypes in the studied groups and subgroups. Cont. – healthy control; SA – group of patients with sarcoidosis; TB – group of patients with tuberculosis.

| Studied group         | Frequency of <i>FCGR2C</i> genotypes [n (%)] |          |       |                |
|-----------------------|----------------------------------------------|----------|-------|----------------|
|                       | 57XX                                         | 57XQ     | 57QQ  | Gene deletions |
| SA total (n = 149)    | 78 (52)                                      | 64 (43)  | 6 (4) | 1 (1)          |
| SA stage I (n = 37)   | 25 (68)                                      | 11 (30)  | 1 (2) | 0              |
| SA stage II (n = 57)  | 40 (70)                                      | 14 (25)  | 3 (5) | 0              |
| SA stage III (n = 34) | 9 (26)                                       | 25 (74)  | 0     | 0              |
| SA stage IV (n = 21)  | 4 (19)                                       | 14 (67)  | 2 (9) | 1 (5)          |
| TB (n = 179)          | 17 (9)                                       | 153 (85) | 5 (3) | 4 (3)          |
| Cont. (n = 148)       | 112 (76)                                     | 33 (22)  | 3 (2) | 0              |

**Table S7.** Frequency of the occurrence of individual *FCGR3A* alleles in the studied groups and subgroups. Cont. – healthy control; SA – group of patients with sarcoidosis; TB – group of patients with tuberculosis.

| Studied group         | Frequency of <i>FCGR3A</i> alleles [n (%)] |          |
|-----------------------|--------------------------------------------|----------|
|                       | 158F                                       | 158V     |
| SA total (n = 120)    | 142 (59)                                   | 98 (41)  |
| SA stage I (n = 23)   | 33 (72)                                    | 13 (28)  |
| SA stage II (n = 54)  | 52 (48)                                    | 56 (52)  |
| SA stage III (n = 23) | 31 (67)                                    | 15 (33)  |
| SA stage IV (n = 20)  | 26 (65)                                    | 14 (35)  |
| TB (n = 179)          | 193 (54)                                   | 165 (46) |
| Cont. (n = 148)       | 167 (56)                                   | 129 (44) |

**Table S8.** Frequency of the occurrence of individual *FCGR3A* genotypes in the studied groups and subgroups. Cont. – healthy control; SA – group of patients with sarcoidosis; TB – group of patients with tuberculosis.

| Studied group         | Frequency of <i>FCGR3A</i> genotypes [n (%)] |          |          |
|-----------------------|----------------------------------------------|----------|----------|
|                       | 158FF                                        | 158FV    | 158VV    |
| SA total (n = 120)    | 47 (39)                                      | 48 (40)  | 25 (21)  |
| SA stage I (n = 23)   | 13 (57)                                      | 7 (30)   | 3 (13)   |
| SA stage II (n = 54)  | 13 (24)                                      | 26 (48)  | 15 (28)  |
| SA stage III (n = 23) | 12 (52)                                      | 7 (30.5) | 4 (17.5) |
| SA stage IV (n = 20)  | 9 (45)                                       | 8 (40)   | 3 (15)   |
| TB (n = 179)          | 49 (27)                                      | 95 (53)  | 35 (20)  |
| Cont. (n = 148)       | 42 (28)                                      | 83 (56)  | 23 (16)  |



**Table S9.** Frequency of the occurrence of individual *FCGR3B* alleles in the studied groups and subgroups. Cont. – healthy control; SA – group of patients with sarcoidosis; TB – group of patients with tuberculosis.

| Studied group         | Frequency of <i>FCGR3B</i> alleles [n (%)] |            |          |
|-----------------------|--------------------------------------------|------------|----------|
|                       | NA1                                        | NA2        | SH       |
| SA total (n = 154)    | 111 (36)                                   | 184 (60)   | 13 (4)   |
| SA stage I (n = 38)   | 32 (42)                                    | 38 (50)    | 6 (8)    |
| SA stage II (n = 60)  | 38 (31.5)                                  | 75 (62.5)  | 7 (6)    |
| SA stage III (n = 35) | 25 (36)                                    | 45 (64)    | 0        |
| SA stage IV (n = 21)  | 16 (38)                                    | 26 (62)    | 0        |
| TB (n = 179)          | 152 (42.5)                                 | 205 (57)   | 1 (0.5)  |
| Cont. (n = 148)       | 113 (38)                                   | 168 (56.5) | 15 (5.5) |

**Table S10.** Frequency of the occurrence of individual *FCGR3B* genotypes in the studied groups and subgroups. Cont. – healthy control; SA – group of patients with sarcoidosis; TB – group of patients with tuberculosis.

| Studied group         | Frequency of <i>FCGR3B</i> genotypes [n (%)] |           |         |         |         |       |
|-----------------------|----------------------------------------------|-----------|---------|---------|---------|-------|
|                       | NA1/NA1                                      | NA1/NA2   | NA1/SH  | NA2/NA2 | NA2/SH  | SH/SH |
| SA total (n = 154)    | 19 (12)                                      | 70 (45.5) | 9 (6)   | 52 (34) | 4 (2.5) | 0     |
| SA stage I (n = 38)   | 5 (13)                                       | 18 (47)   | 4 (11)  | 9 (24)  | 2 (5)   | 0     |
| SA stage II (n = 60)  | 5 (8.5)                                      | 23 (38)   | 5 (8.5) | 25 (42) | 2 (3)   | 0     |
| SA stage III (n = 35) | 7 (20)                                       | 17 (49)   | 0       | 11 (31) | 0       | 0     |
| SA stage IV (n = 21)  | 2 (10)                                       | 12 (57)   | 0       | 7 (33)  | 0       | 0     |
| TB (n = 179)          | 14 (8)                                       | 124 (69)  | 0       | 40 (22) | 1 (1)   | 0     |
| Cont. (n = 148)       | 21 (14)                                      | 57 (39)   | 14 (9)  | 55 (37) | 1 (1)   | 0     |
